# Supplementary material for: Correspondence of Somatic Cell Counts in Bulk-Tank Milk to Prevalence of Subclinical Mastitis in Sheep Flocks
Source: MDPI journal article supplement (doi:10.3390/ani13223541), 2023-11-16
Supplement: s1 [file s1]

# Correspondence of Somatic Cell Counts in Bulk-Tank Milk with Prevalence of Subclinical Mastitis in Sheep Flocks

George C. Fthenakis

**Table S1.** Detailed description of the criteria for definition of subclinical mastitis in sheep flocks.

---

Subclinical mastitis was defined in ewes, in which:

- (1) a bacteriologically positive mammary secretion sample: [a] > 10 colonies of the same organism and [b] no more than two different types of colonies,
  - (2) with concurrently increased cell content: [a] CMT score  $\geq$  'I' and [b] neutrophil and lymphocyte proportion cumulatively  $\geq$  65% of all leucocytes, was detected,
  - (3) with no presence of abnormal gross findings in the mammary gland (including changes in secretion) [Vasileiou et al. 2018].
- 

## Reference

Vasileiou, N.G.C.; Cripps, P.J.; Ioannidi, K.S.; Chatzopoulos, D.C.; Gougoulis, D.A.; Sarrou, S.; Orfanou, D.C.; Politis, A.P.; Calvo Gonzalez-Valerio, T.; Argyros, S. et al. Extensive countrywide field investigation of subclinical mastitis in sheep in Greece. *J. Dairy Sci.* **2018**, *101*, 7297–7310
